# Supplementary material for: Pyridylpentazole and its derivatives: a new source of N5−?
Source: Royal Society of Chemistry journal article supplement (doi:10.1039/c5ra00813a), 2015-01-01
Supplement: c5ra00813a1.pdf [file c5ra00813a1.pdf]

Table S1 Reaction constants of path 2 at 300~1500 K

| $T$<br>(K) | IA                     | IB                     | IC                     | ID                     | IIA                    | IIB                    | IIC                    | IID                    |
|------------|------------------------|------------------------|------------------------|------------------------|------------------------|------------------------|------------------------|------------------------|
| 300        | $2.45 \times 10^{-49}$ | $1.42 \times 10^{-49}$ | $1.00 \times 10^{-48}$ | $2.68 \times 10^{-49}$ | $3.03 \times 10^{-52}$ | $7.31 \times 10^{-50}$ | $1.72 \times 10^{-50}$ | $2.56 \times 10^{-51}$ |
| 400        | $1.19 \times 10^{-33}$ | $4.56 \times 10^{-34}$ | $3.22 \times 10^{-33}$ | $1.28 \times 10^{-33}$ | $5.02 \times 10^{-36}$ | $4.75 \times 10^{-34}$ | $1.34 \times 10^{-34}$ | $4.29 \times 10^{-35}$ |
| 500        | $3.23 \times 10^{-24}$ | $1.73 \times 10^{-24}$ | $6.80 \times 10^{-24}$ | $3.46 \times 10^{-24}$ | $2.85 \times 10^{-26}$ | $1.54 \times 10^{-24}$ | $4.83 \times 10^{-25}$ | $2.47 \times 10^{-25}$ |
| 800        | $5.06 \times 10^{-10}$ | $2.59 \times 10^{-10}$ | $7.21 \times 10^{-10}$ | $5.36 \times 10^{-10}$ | $1.35 \times 10^{-11}$ | $3.16 \times 10^{-10}$ | $1.18 \times 10^{-10}$ | $1.20 \times 10^{-10}$ |
| 1000       | $2.82 \times 10^{-5}$  | $1.43 \times 10^{-5}$  | $3.51 \times 10^{-5}$  | $2.97 \times 10^{-5}$  | $1.09 \times 10^{-6}$  | $1.93 \times 10^{-5}$  | $7.68 \times 10^{-6}$  | $9.79 \times 10^{-6}$  |
| 1500       | $6.15 \times 10$       | $3.06 \times 10$       | $6.40 \times 10$       | $6.47 \times 10$       | $3.92 \times 10$       | $4.84 \times 10$       | $2.07 \times 10$       | $3.58 \times 10$       |
|            | IVA                    | IVB                    | IVC                    | IVD                    | PyN <sub>5</sub>       | PhN <sub>5</sub>       |                        |                        |
| 300        | $1.20 \times 10^{-48}$ | $2.48 \times 10^{-49}$ | $4.29 \times 10^{-50}$ | $4.12 \times 10^{-49}$ | $9.02 \times 10^{-52}$ | $3.53 \times 10^{-53}$ |                        |                        |
| 400        | $7.89 \times 10^{-33}$ | $1.43 \times 10^{-33}$ | $2.94 \times 10^{-34}$ | $1.11 \times 10^{-33}$ | $1.48 \times 10^{-35}$ | $1.24 \times 10^{-36}$ |                        |                        |
| 500        | $2.58 \times 10^{-23}$ | $4.31 \times 10^{-24}$ | $9.85 \times 10^{-25}$ | $2.13 \times 10^{-24}$ | $8.35 \times 10^{-26}$ | $1.11 \times 10^{-26}$ |                        |                        |
| 800        | $5.39 \times 10^{-9}$  | $7.99 \times 10^{-10}$ | $2.12 \times 10^{-10}$ | $1.97 \times 10^{-10}$ | $3.94 \times 10^{-11}$ | $1.05 \times 10^{-11}$ |                        |                        |
| 1000       | $3.31 \times 10^{-4}$  | $4.72 \times 10^{-5}$  | $1.32 \times 10^{-5}$  | $9.22 \times 10^{-6}$  | $3.19 \times 10^{-6}$  | $1.07 \times 10^{-6}$  |                        |                        |
| 1500       | $8.19 \times 10^2$     | $1.11 \times 10^2$     | $3.33 \times 10$       | $1.59 \times 10$       | $1.86 \times 10$       | $5.27$                 |                        |                        |

Table S2 Reaction constants of path 3 at 300~1500 K

| $T$<br>(K) | IA                    | IB                    | IC                    | ID                    | IIA                   | IIB                   | IIC                   | IID                   |
|------------|-----------------------|-----------------------|-----------------------|-----------------------|-----------------------|-----------------------|-----------------------|-----------------------|
| 300        | $3.47 \times 10^{-2}$ | $1.10 \times 10^{-1}$ | $2.51 \times 10^{-2}$ | $5.16 \times 10^{-2}$ | $8.92 \times 10^{-4}$ | $2.57 \times 10^{-3}$ | $9.62 \times 10^{-4}$ | $2.73 \times 10^{-3}$ |
| 400        | $2.65 \times 10^2$    | $6.32 \times 10^2$    | $2.28 \times 10^2$    | $4.40 \times 10^2$    | $1.33 \times 10$      | $4.48 \times 10^1$    | $1.77 \times 10^1$    | $4.83 \times 10$      |
| 500        | $6.13 \times 10^5$    | $1.23 \times 10^5$    | $5.87 \times 10^{-4}$ | $1.09 \times 10^5$    | $4.61 \times 10^3$    | $1.71 \times 10^4$    | $6.96 \times 10^3$    | $1.86 \times 10^4$    |
| 800        | $2.48 \times 10^8$    | $3.83 \times 10^8$    | $2.77 \times 10^8$    | $4.84 \times 10^8$    | $3.41 \times 10^7$    | $1.46 \times 10^8$    | $6.26 \times 10^7$    | $1.61 \times 10^8$    |
| 1000       | $4.10 \times 10^9$    | $5.80 \times 10^9$    | $4.82 \times 10^9$    | $8.25 \times 10^9$    | $6.89 \times 10^8$    | $3.10 \times 10^9$    | $1.35 \times 10^9$    | $3.44 \times 10^9$    |
| 1500       | $1.78 \times 10^{11}$ | $2.23 \times 10^{11}$ | $2.22 \times 10^{11}$ | $3.71 \times 10^{11}$ | $3.89 \times 10^{10}$ | $1.87 \times 10^{11}$ | $8.38 \times 10^{11}$ | $2.09 \times 10^{11}$ |
|            | IIIA                  | IIIB                  | IIIC                  | IIID                  | IVA                   | IVB                   | IVC                   | IVD                   |
| 300        | $3.04 \times 10^{-1}$ | 1.47                  | $1.69 \times 10^{-1}$ | $6.99 \times 10^{-1}$ | $7.59 \times 10^{-2}$ | $2.36 \times 10^{-2}$ | $9.16 \times 10^{-3}$ | $4.01 \times 10^{-3}$ |
| 400        | $1.28 \times 10^3$    | $3.90 \times 10^3$    | $8.46 \times 10^2$    | $2.38 \times 10^3$    | $5.89 \times 10^2$    | $2.51 \times 10^2$    | $1.15 \times 10^2$    | $4.43 \times 10^1$    |
| 500        | $2.07 \times 10^5$    | $4.77 \times 10^5$    | $1.53 \times 10^5$    | $3.39 \times 10^5$    | $1.38 \times 10^5$    | $7.07 \times 10^4$    | $3.59 \times 10^4$    | $1.28 \times 10^4$    |
| 800        | $4.85 \times 10^8$    | $7.37 \times 10^8$    | $4.27 \times 10^8$    | $6.65 \times 10^8$    | $5.66 \times 10^8$    | $3.84 \times 10^8$    | $2.28 \times 10^8$    | $7.23 \times 10^7$    |
| 1000       | $6.68 \times 10^9$    | $8.83 \times 10^9$    | $6.26 \times 10^9$    | $8.66 \times 10^9$    | $9.40 \times 10^9$    | $7.01 \times 10^9$    | $4.39 \times 10^9$    | $1.34 \times 10^9$    |
| 1500       | $2.26 \times 10^{11}$ | $2.49 \times 10^{11}$ | $2.32 \times 10^{11}$ | $2.72 \times 10^{11}$ | $4.09 \times 10^{11}$ | $3.46 \times 10^{11}$ | $2.33 \times 10^{11}$ | $6.71 \times 10^{10}$ |

$k$ s of PyN<sub>5</sub> are  $4.90 \times 10^{-4}$ ,  $1.34 \times 10$ ,  $6.66 \times 10^3$ ,  $8.60 \times 10^7$ ,  $2.10 \times 10^9$  and  $1.54 \times 10^{10}$ , respectively.

$k$ s of PhN<sub>5</sub> are  $2.23 \times 10^{-5}$ , 1.18,  $8.75 \times 10^2$ ,  $2.05 \times 10^7$ ,  $6.10 \times 10^8$  and  $5.79 \times 10^{10}$ , respectively.
